# Supplementary material for: A Novel LncRNA SNHG3 Promotes Osteoblast Differentiation Through BMP2 Upregulation in Aortic Valve Calcification
Source: PubMed Central journal article supplement — JACC Basic Transl Sci. 2022 Sep 26;7(9):899–914. doi: 10.1016/j.jacbts.2022.06.009 (PMC9617132; doi:10.1016/j.jacbts.2022.06.009), 2022-09-26
Supplement: mmc1.pdf [file mmc1.pdf]

1 **Supplementary Appendix**

2 **A Novel LncRNA SNHG3 Promotes Osteoblast Differentiation through Upregulating**  
3 **BMP2 in Aortic Valve Calcification**

4 **Brief title: The role of SNHG3 in calcific aortic valve disease.**

5 Long Chen, MD <sup>a#</sup>, Hanning Liu, MD, PhD <sup>a#</sup>, Cheng Sun, MD, PhD <sup>a</sup>, Jianqiu Pei, PhD <sup>a</sup>,  
6 Jun Li, MD <sup>a</sup>, Yue Li, PhD <sup>a</sup>, Ke Wei, MD, PhD <sup>a</sup>, Xiaoyi Wang, MD <sup>a</sup>, Peng Wang, MD <sup>a</sup>,  
7 Fangzhou Li, MD <sup>a</sup>, Shujie Gai, MD, PhD <sup>a</sup>, Yan Zhao, MD <sup>a</sup>, and Zhe Zheng, MD, PhD <sup>a\*</sup>

8 **Author's affiliations:**

9 <sup>a</sup> Department of Cardiovascular Surgery, State Key Laboratory of Cardiovascular Disease,  
10 National Center for Cardiovascular Disease, China & Fuwai Hospital, Chinese Academy of  
11 Medical Sciences & Peking Union Medical College, No. 167 Beilishi Road, Xicheng District,  
12 Beijing 100037, People's Republic of China.

13 \* Address for correspondence: Zhe Zheng, email: [zhengzhe@fuwai.com \(Z.Z.\)](mailto:zhengzhe@fuwai.com), Tel: +86-8839-  
14 6051, Fax: +86-8839-6051.

15 <sup>#</sup> These authors contributed equally to this work and should be considered as co-first authors.

16

17

18

19

20

## 21 **Detailed Materials and Methods**

### 22 **Clinical sample**

23 This study was performed with the approval of the institutional Ethics Committees of the Fuwai  
24 hospital, Chinese Academy of Medical Sciences and complied with the Declaration of Helsinki  
25 (No.2012-404). All the patients signed the written informed consent before participating in the  
26 study. Human calcific aortic valve leaflets were obtained from patients with CAVD during  
27 aortic valve replacement. Control non-mineralized aortic valves were collected from the  
28 explanted hearts of patients who underwent heart transplantation procedures. The clinical  
29 characteristic patients for lncRNA Sequencing are shown in **Supplementary Table 1** and for  
30 RT-qPCR analysis are shown in **Supplementary Table 2**. The calcification staining for human  
31 aortic valve tissues are shown in **Supplementary Figure 1**.

### 32 **Primary human valvular interstitial cells isolation and culture**

33 HVICs were isolated from noncalcified aortic valves obtained from patients undergoing heart  
34 transplantation. The clinical characteristics of patients are shown in **Supplementary Table 3**.  
35 Primary hVICs were isolated, and purity of the cell preparation was confirmed as described  
36 previously (1). Briefly, aortic valve leaflets were digested in 1 mg/ml collagenase (type I) at  
37 37°C for 30 minutes, vortexed to remove endothelial cells, and further digested with a fresh  
38 solution of 4.5 mg/ml collagenase at 37°C for 1 hour. After repeated aspirations to break up the  
39 tissue fragments, the cell suspension was gently spun at 1000 rpm for 10 min to precipitate cells.  
40 Isolated cells were resuspended, seeded, and then cultured in Dulbecco's modified Eagle's

41 medium (Gibco, Invitrogen Corporation, Carlsbad, CA, USA) containing 100 µg/mL  
42 streptomycin (Gibco), 10% fetal bovine serum, and 100 U/mL penicillin (Gibco) at 37°C  
43 supplied with 5% CO<sub>2</sub> atmosphere. All experiments involving hVICs were performed on cells  
44 from independent patients. Cell between passages 3 to 7 were chosen for further experiments  
45 and incubated with an osteogenic induction medium to stimulate osteogenic differentiation as  
46 previously described (2), which was consisted of DMEM + 5% FBS, 10<sup>-7</sup> M insulin, 50 µg/ml  
47 ascorbic acid and NaH<sub>2</sub>PO<sub>4</sub> at 2 mM.

#### 48 **Real-time polymerase chain reaction**

49 RNA was extracted from aortic valve tissues and cells during in vitro experiments. Total RNA  
50 was isolated with Trizol reagent (Invitrogen Corporation, CA), and then was reverse transcribed  
51 into cDNA using PrimeScript RT Master Mix (RR036A, Takara, JA). Real-time quantitative  
52 PCR was performed with TB Green Premix Ex Taq II (RR820A, Takara, JA) according to the  
53 manufacturer's recommendations. The reactions were carried out in QuantStudio™ 5 System  
54 (Applied Biosystems Inc, USA) with gene-specific primers. The primers were designed on the  
55 website of Primer Bank (<https://pga.mgh.harvard.edu/primerbank/>) and PrimerBlast  
56 ([https://www.ncbi.nlm.nih.gov/tools/primer-blast/index.cgi?LINK\\_LOC=BlastHome](https://www.ncbi.nlm.nih.gov/tools/primer-blast/index.cgi?LINK_LOC=BlastHome)). All the  
57 primer sequences used in this research are listed in **Supplementary Table 5**.

#### 58 **Subcellular RNA fractionation of hVICs**

59 Nuclear and cytoplasmic RNA was purified according to manufacturer's recommendation of  
60 the Nuclear and Cytoplasmic RNA Purification Kit (21000, Norgen Biotek, Canada). Then,

61 nuclear RNA fractionation was centrifuged for 2 min at 16,400 x g at 4°C to separate the nuclear  
62 soluble fraction in the supernatant from the chromatin-associated fraction in the nuclear  
63 remaining pellet and then the expression of SNHG3 in different subcellular fractionations was  
64 analyzed by RT-qPCR. The expression of GAPDH was used as a cytoplasmic control, and U6  
65 and lncRNA H19 was used as a nuclear control.

#### 66 **Western blotting**

67 Protein was extracted from cells using RIPA lysis buffer containing protease and phosphatase  
68 inhibitors (Thermo Scientific, USA), separated by sodium dodecyl sulfate-polyacrylamide gel  
69 electrophoresis (SDS-PAGE) gel, transferred to polyvinylidene difluoride membranes.  
70 Membranes were incubated with primary antibodies overnight at 4°C, followed by anti-mouse  
71 or rabbit horseradish peroxidase (HRP)-conjugated secondary antibodies (7076/7074, CST,  
72 dilution, 1:1000). Afterwards, the protein-antibody complex was visualized by enhanced  
73 chemiluminescence assay (34095, Pierce). Primary antibodies against Osteopontin (ab166709,  
74 abcam, dilution 1:1000), Osteocalcin (ab133612, abcam, dilution 1:1000), RUNX2 (D1L7F,  
75 CST, dilution 1:1500), BMP2 (ab14933, abcam, 1:2000), pSmad1/5 (D5B10, CST, dilution  
76 1:1000), Smad1 (D59D7, CST, dilution 1:1000), EZH2(ab191250, abcam, 1;1000), H3(ab1791,  
77 abcam, dilution 1:1000), H3K27me3 (ab6002, abcam, dilution 1:1000), GAPDH (14C10, CST,  
78 dilution 1:2000) were used.

79 **RNA in situ hybridization**

80 RNA-FISH Cy3-labelled SNHG3 probes were synthesized from RiboBio (Guangzhou, China).  
81 RNA-FISH assays were conducted using fluorescent in situ hybridization kit (RiboBio,  
82 Guangzhou, China) according to the manufacturer's recommendation. Briefly, cells plated in  
83 confocal dishes ( $2 \times 10^4$ /dishes) were fixed by 4% formaldehyde in PBS for 10 min at room  
84 temperature, permeabilized with 1% Triton X-100 for another 15min, and then rinsed once in  
85  $2 \times$  SSC. After that, hybridization was carried out at 37°C for 10-15 hours using Cy3-labeled  
86 SNHG3. Finally, the cells were stained with 4'-6-diamidino-2-phenylindole (DAPI) to show  
87 the nuclear. Images were taken with a fluorescence microscope (Lecia, Wentzler, Germany)  
88 and merged using Image Pro-Plus software (Media Cybernetics, Bethesda, MD).

89 **Detection of alkaline phosphatase activity (ALP)**

90 Alkaline phosphatase activity (ALP) in the cell lysates was assayed using a colorimetric assay  
91 kit (Biovision, K412-500, SF, USA) by measuring the p-nitrophenol release in absorbance at  
92 405 nm. Results are presented as relative ALP activity normalized to that of the control cells.

93 **Determination of calcium concentrations**

94 Calcium content in cell cultures was determined by the Arsenazo III method (Synermed,  
95 Monterey Park, CA, USA), which depends on the specific reaction of Arsenazo III with calcium  
96 to produce a blue complex. Results are measured at 650 nm on a spectrophotometer (Infinite  
97 M200 Pro, Tecan, Männedorf, Switzerland). This reaction is specific for calcium. Magnesium  
98 is prevented from forming a complex with the reactive.

99 **Alizarin Red S staining of cultured cells**

100 Cells were stained with 2% Alizarin Red solution. Alizarin Red solution was prepared by  
101 dissolving 2 g Alizarin Red (Sigma Aldrich, USA) in 100 mL distilled water and mixing well,  
102 and the pH was adjusted to 4.2 with 1 mM NaOH. The stained cells were then incubated for 30  
103 min in 10% acetic acid to quantify the calcium deposition, and the absorbance was read at 405  
104 nm with a spectrophotometer (Infinite M200 Pro, Tecan, Männedorf, Switzerland).

105 **High-throughput lncRNA sequencing and data analysis**

106 Gene expression was evaluated in human aortic valve tissues explanted from patient of aortic  
107 valve replacement or heart transplantation. Total RNA from different experimental groups were  
108 extracted. First, ribosomal RNA (rRNA) was removed by Ribo-Zero <sup>TM</sup> rRNA Removal Kit  
109 (Epicentre). Sequencing libraries were prepared from the rRNA-depleted RNA by NEBNext®  
110 Ultra <sup>TM</sup> Directional RNA library Prep Kit for Illumina® (New England Biolabs) following  
111 manufacturer's recommendations, and then sequenced on the Illumine HiSeq 2500 platform by  
112 Novogene (China) and 100 bp paired end reads were generated. Clean data (clean reads) were  
113 obtained through in-house Perl scripts by removing reads containing adapter, reads containing  
114 ploy N and low-quality reads from raw data, and aligned to the *homo sapiens* GRCh38.p12  
115 genome using TopHat2 v2.0.9 (3). The mapped reads of each sample were assembled by  
116 StringTie (v1.3.1) (4). Transcripts predicted with coding potential by either/all of the four tools  
117 [Coding-Non-Coding-Index (CNCI) (v2) (5), CPC (0.9-r2) (6), Pfam Scan (v1.3) (7) and  
118 PhyloCSF (v20121028) (8)] were filtered out, and those without coding potential were

119 candidate set of lncRNAs. Quantile normalization and subsequent data processing was  
120 performed using the R software limma package (9). Normalized Intensity of each group  
121 (averaged normalized intensities of replicate samples, log<sub>2</sub> transformed) were analyzed by  
122 paired t-test (P value cut off: 0.05). Volcano plot filtering was performed to show differentially  
123 expressed lncRNAs with statistical significance between two groups. The distinguishable  
124 lncRNAs expression pattern among samples were identified through hierarchical clustering.  
125 The sequencing data of human aortic valves have been deposited in the Gene Expression  
126 Omnibus (GEO) database under accession number GSE199718. Deregulated mRNAs due to  
127 the absence or overexpression of SNHG3 were analyzed by Gene Set Enrichment Analysis  
128 GSEA with gesaplot2 R package (10). Gene set enrichment analysis (GSEA) was applied using  
129 annotations from hallmark gene sets to reduce noise and redundancy (11).

### 130 **Cell transfection**

131 For transfection of ASOs, cells were transfected with Lipofectamine iMax (Invitrogen, MA,  
132 USA) following the manufacturer's guide. The antisense oligonucleotides (ASO) targeting  
133 human SNHG3 (ASO-SNHG3) and negative control ASO (ASO-NC) with no definite target  
134 were adopted and purchased from RiboBio (Guangzhou, China). The ASO-SNHG3 sequence  
135 was seen in **Supplementary Table 5**. For stable overexpression of SNHG3, the sequence of  
136 this transcript was cloned into an adenovirus vector (Ad<sup>+</sup>). This bidirectional construct enables  
137 a simultaneous and independent expression of the marker cassette for e-GFP-2A-Puro and of  
138 SNHG3 (Ad-SNHG3) or a control sequence (Ad-GFP). All the in vitro experiments, unless

139 specified, were performed as at least three independent experiments with three replicates each  
140 time.

#### 141 **Inhibitors**

142 Cells were treated with 5-aza-2'-deoxycytidine, an inhibitor of DNA methyltransferases, for 24  
143 hours at a concentration of 1  $\mu$ M (Sigma-Aldrich, ON, Canada). For BMP pathway studies,  
144 cells were treated with 100 ng/mL inhibitor LDN-193189 (Selleckchem, S2618, diluted in  
145 DMSO) or 50 ng/mL human BMP2 (R&D, 355-BM-010), and control cells were treated with  
146 equal volumes of DMSO (0.1% DMSO).

#### 147 **Bisulfite sequencing PCR**

148 DNA was extracted hVICs with the DNeasy Blood and Tissue Kit (Qiagen, CA, USA) and  
149 followed by bisulfate modification. The bisulfite sequencing analysis was performed with  
150 EpiTect Bisulfite Kit (Qiagen, CA, USA) following the provider's manual. The following  
151 primers were used for PCR designed by MethPrimer (12):

152 Methylated BMP2 forward: 5'-TTTAGGGTTAGGAGAGCGAGG-3', reverse: 5'-  
153 GACGATCTCGATAACCAAACG-3'; Unmethylated BMP2 forward: 5'-  
154 TTTAGGGTTAGGAGAGTGAGG-3', reverse: 5'-  
155 ACAACAATCTCAATACCAAACAAAT-3'.

#### 156 **Chromatin immunoprecipitation (ChIP) assay**

157 HVIC cells were transfected with Ad-SNHG3 or Ad-GFP. Cells were crosslinked with 1%  
158 formaldehyde and further processed according to the supplier's protocol of the Pierce Agarose



159 CHIP Kit (Thermo Fisher Scientific, MA, USA) using H3K27me3 (5 µg, ab6002, abcam,  
160 Cambridge, UK) and IgG antibody (5 µg, ab172730, abcam, Cambridge, UK) to investigate the  
161 potential association between H3K27me3 and BMP2 promoter. The IgG antibody served as  
162 control. The probe sequences used in our assay were listed below:

163 Forward: 5'-CCTTGTTTGCGGTGCAATGA-3'

164 Reverse: 5'-AGGCGAATTAGGCACTTGCT-3'

### 165 **SNHG3 pull-down**

166 Biotinylated RNA probes complementary to the back splice sequence of SNHG3 was designed  
167 and synthesized by GenePharma(Suzhou, China). Pull down assay with the biotinylated  
168 SNHG3 probe was performed with Pierce™ magnetic RNA-protein pull-down kit (Thermo  
169 Scientific, USA) as previously described (13). Briefly, to generate probe-coated magnetic beads,  
170 the Biotinylated-SNHG3 probe was resuspended in wash/binding buffer (0.5 mol/L NaCl, 20  
171 mmol/L Tris-HCl, PH 7.5, and 1 mmol/L EDTA), followed by incubation with Dynabeads  
172 MyOne Streptavidin C1 (Thermo Fisher, MA, USA) at 4°C for 4 hours. Subsequently, hVICs  
173 were lysed, sonicated, and then incubated with SNHG3 probe or oligo Probe at 4°C overnight.  
174 After treatment with the wash/binding buffer to wash and elute the RNA-binding protein  
175 complexes, the protein complexes bound to the beads were isolated for further western blot  
176 analysis according to standard procedures.

177 **RNA immunoprecipitation**

178 RNA immunoprecipitation (RIP) involved use of the Magna RIP RNA-Binding Protein  
179 Immunoprecipitation kit (Millipore, MA, USA). Briefly, RNA immunoprecipitation was  
180 performed in nuclear lysates of  $10^7$  hVICs after SNHG3 knock-down (ASO treatment for 48  
181 hours) or corresponding control group. hVICs were lysed in RIP lysis buffer before the  
182 supernatant was pre-cleared by protein G agarose beads. Then, the pre-cleared cell lysate was  
183 transferred to a tube containing antibody-immobilized protein G agarose beads. After overnight  
184 incubation at 4°C, the RNA-bound complex was washed, and stored for RNA isolation. The  
185 anti-EZH2 antibody (ab191250, abcam, Cambridge, UK) and control rabbit IgG (#PP64B,  
186 Merck Millipore) was used. The SNHG3 in EZH2 immunoprecipitated complex was measured  
187 by RT-qPCR.

188 **Immunofluorescence staining**

189 Immunofluorescence staining was applied for identifying hVICs isolation from human aortic  
190 valve with alpha smooth muscle actin ( $\alpha$ -SMA) and Vimentin. Briefly, at the end of culture or  
191 treatment periods, hVICs were washed twice in PBS, fixed in 4% paraformaldehyde for 10 min  
192 and then permeabilized with 0.1% TritonX-100 in PBS for another 10 min. Next, the cells were  
193 incubated with primary antibodies against  $\alpha$ -SMA (ab124964, 1:200, abcam) and Vimentin  
194 (ab8978, 1:200, abcam) followed by incubation with florescent conjugated secondary  
195 antibodies (1:150; abcam) and counterstaining with DAPI (Sigma). Images were taken with a

196 fluorescence microscope (Leica, SP8, Wetzlar, Germany) and merged using ImageJ software  
197 (NIH).

#### 198 **In silicon prediction of RNA-protein interaction**

199 The binding propensity between SNHG3 and EZH2 was predicted using software package  
200 catRAPID (14) and RNA-Protein Interaction Prediction (RPISeq) (15). This algorithm  
201 estimates the binding propensity of protein-RNA pairs considering secondary structures,  
202 hydrogen bonds and van der Waals contributions. Amino acid-nucleotide interaction between  
203 protein and RNA sequences are represented as interaction matrix.

#### 204 **In silicon RNA secondary structure prediction**

205 RNA secondary structure was predicted by RNAfold WebServer (16)  
206 (<http://rna.tbi.univie.ac.at/cgi-bin/RNAfold.cgi>) based on Minimum Free Energy (MFE) and  
207 partition function.

#### 208 **Animal experiments**

209 All animal studies were carried out in accordance with protocols approved by the Ethics  
210 Committee of Fuwai Cardiovascular Hospital, Chinese Academy of Medical Sciences for the  
211 Use and Care of Laboratory animals (NO. FW-2020-0022), and all the procedures complied  
212 with US National Institutes of Health (NIH Publication No.85-23, revised 1996) on the  
213 protection of animals used for scientific purposes. Adult ApoE<sup>-/-</sup> (C57BL/6 background) aged  
214 eight weeks were purchased from Beijing Vital River Laboratory Animal Technology Co., Ltd.,  
215 housed in a pathogen-free, temperature-controlled environment under a 12:12 hours light-dark

216 cycle. The mice were randomly allocated to 2 groups: mice fed normal diet (ND group, n=30);  
217 mice fed 4% high cholesterol diet (HCD group, n=30). From the 12th week of the high-  
218 cholesterol diet to the 24th week every 4 weeks, echocardiography was used to evaluate the  
219 degree of aortic valve stenosis in the mice of the two groups and 6 mice in each group were  
220 sacrificed at each time point in order to collect aortic valves to detect the expression level of  
221 SNHG3 and osteogenic differentiation markers (ALP, RUNX2, osteopontin[OPN]) through  
222 RT-qPCR. Another 6 mice in each group were sacrificed at 24th week of diet to collect aortic  
223 valves making into paraffin slides for pathological staining.

224 Then ASO-SNHG3 (SNHG3 group, n=20) or ASO-NC (NC group, n=20) (5 nM/ injection) in  
225 saline was injected into the lateral tail vein twice a week for 12 weeks from the 12th week of  
226 high cholesterol diet. At the end of protocol, mice were euthanized by intravenous injection of  
227 a lethal dose of pentobarbital sodium (100 mg/kg), and the aortic valves of 10 mice in each  
228 group were used to extract RNA to detect expression levels of SNHG3 and osteogenic  
229 differentiation markers, and the other 10 mice were used to make paraffin sections for  
230 pathological staining.

### 231 **In situ hybridization of tissue sections**

232 The RNA scope probe target Mus-SNHG3 was designed and synthesized by Advanced Cell  
233 Diagnostics company, and detection of SNHG3 expression was performed on an mice aortic  
234 valve tissue sections using an RNAscope 2.5 High Definition (HD)-BROWN Assay kit  
235 according to the manufacturer's instructions (Advanced Cell Diagnostics, Newark, CA, USA).

236 Briefly, tissues were fixed by 10% Neutral Buffered Formalin (NBF) followed by cell  
237 pretreatment with pretreat NO.1 solution and pretreat NO.3 solution. Then, tissues were  
238 hybridized with Mm-SNHG3-specific probe pairs, which were then hybridized to a cascade of  
239 signal amplification molecules, culminating in binding of HRP-labeled probes. Finally, pictures  
240 with DAB staining and hematoxylin counterstaining were taken. The images were acquired  
241 with a Panoramic MIDI Viewer (3D HISTECH Ltd., Budapest, Hungary). The signals were  
242 visually scored based on the average number of dots per cell using the following criteria: 0 (no  
243 staining or < 1 dot/10 cells), 1 (1–3 dots/cell), 2 (4–9 dots/cell. None or very few dot clusters),  
244 3 (10–15 dots/cell and < 10% of the dots presented in clusters), 4 (> 15 dots/cell and > 10% of  
245 the dots presented in clusters).

#### 246 **Echocardiography**

247 Transthoracic echocardiography was performed under 2.5% isoflurane anesthesia, with an  
248 18~38 MHZ phased-array probe (MS400) connected to a Vevo 2100 Imaging system  
249 (VisualSonics, Toronto, Canada). Two-dimensional guided M-mode imaging was obtained in  
250 the parasternal long- and short-views at the level of the papillary muscles. Left ventricular  
251 internal diameters at end-diastole (LVIDd), Left ventricular internal diameters at end-systole  
252 (LVIDs), Right ventricular internal diameters at end-diastole (RVIDd), Right ventricular  
253 internal diameters at end-systole (RVIDs), ejection fraction (EF), fractional shortening (FS),  
254 left ventricular stroke volume (SV), cardiac output (CO), and aortic valve area (AVA) were  
255 calculated with the established standard equation. Peak velocity of E- and A- waves were

256 recorded by pulsed-wave Doppler in the apical 4-chamber view, and mitral annulus motion  
257 velocity during early filing E' was measured using continuous-wave Doppler in the apical 5-  
258 chamber view. All the measurements were made from 5 consecutive cardiac cycles and  
259 averaged. The echocardiography analyses were evaluated by three individuals in a blinded  
260 fashion.

### 261 **Hematoxylin and eosin, Von Kossa, Alizarin Red staining of aortic valves**

262 Aortic valves were rinsed in PBS, fixed in 4% paraformaldehyde, and embedded in paraffin.  
263 Then the aortic valves were cut into 4 um slices and stained with hematoxylin and eosin (H&E),  
264 Von Kossa and alizarin red staining as previously described (17,18). The thickness of the aortic  
265 valve leaflets was measured as described previously (19). The leaflet sections were obtained  
266 from each group, and leaflet thickness was determined using ImageJ 1.55 (NIH, Bethesda, MD,  
267 USA) by three individuals in a blinded fashion. We analyzed mean aortic valve leaflet thickness  
268 of 3 leaflets from each animal and used the mean thickness of ND group as a reference against  
269 those of the HCD group, HCD + ASO-NC group and HCD + ASO-SNHG3 group.

### 270 **Statistical analysis**

271 Continuous data are presented as the mean value  $\pm$  standard error of the mean (SEM) or mean  
272 value  $\pm$  standard deviation (SD) for normally distributed data. The normality of the distribution  
273 of continuous data was confirmed by Shapiro-Wilk test and was visualized by a Q-Q plot. The  
274 Levene test was used to confirm the homogeneity of variance of continuous data. For normally  
275 distributed data, comparisons between the two groups were evaluated for significance using the

276 unpaired Student's t-test or Welch's t-test, whereas comparisons among three or more groups  
277 were evaluated for significance using analysis of variance (ANOVA) followed by least  
278 significance difference (LSD), Holm-Sidak, Dunett's test and Bonferroni multiple comparison  
279 post hoc test using the SPSS software. The data that are not normality distributed were  
280 compared using the Mann-Whitney U test (2 groups) or Kruskal-Wallis test (>2 groups). The  
281 counts of category data were compared using chi-square analysis between two independent  
282 groups. The association between the two continuous variables was evaluated using a two-tailed  
283 Pearson's correlation analysis. Statistical significance was set at  $p < 0.05$ . Differential expression  
284 analysis of lncRNAs in CAVD and non-mineralized control group using the limma R package  
285 and the log<sub>2</sub> fold change was computed as log<sub>2</sub> (calcified aortic valve) minus log<sub>2</sub> (non-  
286 mineralized aortic valve).

287 **Supplementary Tables**288 **Supplementary Table 1: Clinical characteristics of patients for lncRNA Sequencing**

|                                       | Non-mineralized valves | Calcific valves | P      |
|---------------------------------------|------------------------|-----------------|--------|
| Sample, n                             | 12                     | 10              |        |
| Age, years                            | 48.5 ± 9.8             | 60.4 ± 4.8      | 0.002  |
| Male, n (%)                           | 10 (83.3)              | 9 (90.0)        | 0.65   |
| BMI, Kg/m <sup>2</sup>                | 22.3 ± 2.8             | 24.6 ± 3.3      | 0.089  |
| Smoking, n (%)                        | 7 (58.3)               | 8 (80)          | 0.277  |
| Diabetes mellitus, n (%)              | 3 (25)                 | 1 (10)          | 0.724  |
| Hypertension, n (%)                   | 2 (16.7)               | 6 (60)          | 0.074  |
| Hyperlipidemia, n (%)                 | 4 (33.3)               | 6 (60)          | 0.412  |
| BAV, n (%)                            | 0                      | 3 (30)          | 0.078  |
| LVEF, %                               | 27.8 ± 8.03            | 62.3 ± 4.00     | <0.001 |
| Statins, n (%)                        | 5 (41.7)               | 6 (60)          | 0.392  |
| β-Blockers, n (%)                     | 4 (33.3)               | 6 (60)          | 0.412  |
| ACEi/ARB, n(%)                        | 5 (41.7)               | 4 (40)          | >0.99  |
| Transvalvular pressure gradient, mmHg | 15.26 ± 6.36           | 64.35 ± 16.86   | <0.001 |
| AVA, cm <sup>2</sup>                  | 3.28 ± 0.83            | 0.92 ± 0.31     | <0.001 |
| AS, n (%)                             | 0                      | 10              | <0.001 |

289 Note: Values are means ± standard deviation or n (%).



290 Abbreviations: BMI, body mass index; LVEF, left ventricular ejection fraction; BAV, bicuspid

291 aortic valve; AS, aortic stenosis, AVA, aortic valve area.

292

293

294

295

296

297

298

299

300

301

302

303

304

305

306

307

308 **Supplementary Table 2: Clinical characteristics of patients for RT-qPCR analysis**

|                                        | Non-mineralized valves | Calcific valves | P      |
|----------------------------------------|------------------------|-----------------|--------|
| Sample, n                              | 20                     | 30              |        |
| Age, years                             | 55.3 ± 8.2             | 58.4 ± 3.83     | 0.08   |
| Male, n (%)                            | 12 (60.0)              | 18 (60.0)       | >0.99  |
| BMI, Kg/m <sup>2</sup>                 | 22.6 ± 2.9             | 23.5 ± 2.7      | 0.27   |
| Smoking, n (%)                         | 10 (50.0)              | 13 (43.3)       | 0.64   |
| Diabetes mellitus, n (%)               | 5 (25.0)               | 6 (20.0)        | 0.68   |
| Hypertension, n (%)                    | 8 (40.0)               | 9 (30.0)        | 0.47   |
| Hyperlipidemia, n (%)                  | 6 (30.0)               | 8 (26.7)        | 0.80   |
| BAV, n (%)                             | 0                      | 3 (10)          | 0.16   |
| LVEF, (%)                              | 30.1 ± 7.4             | 64.5 ± 8.3      | <0.001 |
| Statins, n(%)                          | 6 (30)                 | 8 (26.7)        | 0.80   |
| β-Blockers, n (%)                      | 12 (60)                | 16 (53.3)       | 0.64   |
| ACEi/ARB, n(%)                         | 11 (55.5)              | 18 (60)         | 0.73   |
| Transvalvular pressure gradient (mmHg) | 13.36 ± 3.82           | 73.24 ± 26.31   | <0.001 |
| AVA, cm <sup>2</sup>                   | 3.69 ± 0.46            | 0.68 ± 0.21     | <0.001 |
| AS, n (%)                              | 0                      | 30              | <0.001 |

309 Note: Values are means ± standard deviation or n (%).

310 Abbreviations: BMI, body mass index; LVEF, left ventricular ejection fraction; BAV, bicuspid

311 aortic valve; AS, aortic stenosis, AVA, aortic valve area.

312

313

314

315

316

317

318

319

320

321

322

323

324

325

326

327

328

329 **Supplementary Table 3: Clinical characteristics of patients for cell cultures**

| <b>Parameters</b>                         | <b>Non-mineralized valve</b> |
|-------------------------------------------|------------------------------|
| Sample, n                                 | 10                           |
| Age, y                                    | 47.1 ± 13.2                  |
| Male, n (%)                               | 6 (60)                       |
| BMI, kg/m <sup>2</sup>                    | 23.1 ± 3.0                   |
| Smoking, n (%)                            | 1(10)                        |
| Diabetes mellitus, n (%)                  | 5 (50)                       |
| Hypertension, n (%)                       | 3 (30)                       |
| Hyperlipidemia, n (%)                     | 2 (20)                       |
| BAV, n (%)                                | 0                            |
| LVEF (%)                                  | 29.1 ± 6.0                   |
| Statins, n(%)                             | 4 (40)                       |
| β-Blockers, n (%)                         | 4 (40)                       |
| ACEi/ARB, n(%)                            | 5 (50)                       |
| Transvalvular pressure grandient,<br>mmHg | 12.38 ± 3.82                 |
| AVA, cm <sup>2</sup>                      | 3.37 ± 0.51                  |
| AS, n (%)                                 | 0                            |

330 Note: Values are means ± standard deviation or n (%).

331 Abbreviations: BMI, body mass index; LVEF, left ventricular ejection fraction; BAV, bicuspid

332 aortic valve; AS, aortic stenosis; AVA, aortic valve area.

333

334

335

336

337

338

339

340

341

342

343

344

345

346

347

348

349

350 **Supplementary Table 4. Differentially expressed lncRNAs between calcified aortic valves**  
 351 **and non-mineralized control.**

| <b>Gene</b> | <b>Log2foldchange</b> | <b>P. Value</b> | <b>Adj. P. Value</b> |
|-------------|-----------------------|-----------------|----------------------|
| H19         | 3.095080069           | 1.27E-05        | 0.002893561          |
| SFTA1P      | 2.078357747           | 8.24E-05        | 0.008404232          |
| SNHG3       | 1.890750966           | 1.84E-14        | 8.09E-10             |
| AC004988.1  | 1.801660853           | 1.23E-06        | 0.000834623          |
| LINC01060   | 1.693807801           | 0.005913671     | 0.104436661          |
| AP001189.4  | 1.661672703           | 0.000300255     | 0.018265794          |
| LINC00702   | 1.641611262           | 0.002672971     | 0.066993535          |
| LINC01592   | 1.636321881           | 0.000904209     | 0.035185738          |
| LINC01450   | 1.525521068           | 0.000212985     | 0.014449838          |
| UNC5B-AS1   | 1.453359057           | 3.04E-07        | 0.000343734          |
| LINC01614   | 1.44707174            | 0.002516282     | 0.064887073          |
| AC012462.2  | 1.435872021           | 6.83E-05        | 0.007669113          |
| RGS5        | 1.364045163           | 0.001631298     | 0.050491125          |
| FAM225A     | 1.323248632           | 0.000183963     | 0.013364686          |
| LZTS1-AS1   | 1.310162878           | 3.46E-05        | 0.005108973          |
| AC005943.2  | 1.251417445           | 0.041866232     | 0.288253291          |
| AC007906.1  | 1.249434364           | 0.001488356     | 0.04802429           |
| LINC00545   | 1.22294784            | 2.86E-05        | 0.004640681          |
| TYMSOS      | 1.212602671           | 0.000834824     | 0.033456756          |
| AC017002.2  | 1.202186143           | 5.67E-05        | 0.006876721          |
| AC067945.3  | 1.162936697           | 0.010007272     | 0.140642553          |
| FNDC1-IT1   | 1.154301758           | 0.004839106     | 0.094599896          |
| ZNF385D-AS2 | 1.14573453            | 0.013991332     | 0.165520879          |
| LINC01142   | 1.129646762           | 0.00413888      | 0.086682271          |
| FAM155A-IT1 | 1.110151521           | 0.001806903     | 0.053831945          |
| LINC01117   | 1.108203957           | 0.002192267     | 0.059909905          |
| AC133644.2  | 1.102213569           | 1.52E-05        | 0.003170867          |
| LRP1-AS     | 1.081972489           | 2.94E-05        | 0.004707311          |
| AC108463.2  | 1.071664879           | 0.020619419     | 0.202729052          |
| AC002401.1  | 1.027838518           | 0.004595577     | 0.092003446          |
| LINC01561   | 1.020160488           | 0.009600917     | 0.138461952          |
| HOTAIRM1    | 1.01893228            | 0.002534751     | 0.065103844          |
| LINC01259   | 1.007982903           | 0.014327209     | 0.167724033          |
| C11orf40    | -1.000468083          | 0.005850269     | 0.103815173          |
| FLJ31356    | -1.007428487          | 0.002186818     | 0.05986091           |

|              |              |             |             |
|--------------|--------------|-------------|-------------|
| C15orf56     | -1.009153588 | 0.006862973 | 0.114540646 |
| AL022397.1   | -1.018028489 | 0.002052048 | 0.057899034 |
| VIPR1-AS1    | -1.021291504 | 0.003788128 | 0.082108419 |
| AC091493.1   | -1.032572762 | 0.000897582 | 0.035016029 |
| AC103563.9   | -1.04375828  | 0.003703039 | 0.081102271 |
| LINC00689    | -1.047114588 | 4.51E-05    | 0.006038358 |
| LINC01153    | -1.047151935 | 0.009499969 | 0.137614697 |
| RAMP2-AS1    | -1.049634006 | 4.13E-05    | 0.00562999  |
| TRHDE-AS1    | -1.061285929 | 1.02E-05    | 0.002686769 |
| NRG1-IT1     | -1.088310277 | 0.010995953 | 0.147293427 |
| LINC01392    | -1.093870003 | 0.00070731  | 0.030333763 |
| AC004870.4   | -1.112944809 | 0.012477281 | 0.156077636 |
| LINC01625    | -1.150741749 | 0.000188961 | 0.013466998 |
| AC079117.1   | -1.158275136 | 0.013582956 | 0.163589745 |
| ELOVL2-AS1   | -1.160981239 | 8.84E-07    | 0.000670958 |
| LINC01030    | -1.183685274 | 0.003860819 | 0.08294923  |
| LINC01168    | -1.200877893 | 0.010071442 | 0.141172573 |
| AC019055.1   | -1.206775032 | 0.000559033 | 0.026187474 |
| AC008691.1   | -1.217914822 | 0.002374935 | 0.062786107 |
| LINC01539    | -1.226622798 | 0.017395325 | 0.18537617  |
| LINC00334    | -1.237072624 | 0.012247765 | 0.154976299 |
| ZNF341-AS1   | -1.283575242 | 0.007217838 | 0.11774165  |
| GACAT3       | -1.286640812 | 0.000406491 | 0.022130405 |
| ARHGAP26-AS1 | -1.324184668 | 0.001471382 | 0.047791703 |
| LINC01049    | -1.332279028 | 0.004640936 | 0.092449292 |
| PLCH1-AS1    | -1.357912806 | 5.42E-05    | 0.006693954 |
| PLCH1-AS2    | -1.388409005 | 0.005032948 | 0.09629504  |
| CACNA2D3-AS1 | -1.407034465 | 0.000402347 | 0.021990376 |
| AC011625.1   | -1.499429051 | 1.89E-05    | 0.003590072 |
| MAPT-IT1     | -1.53794834  | 8.82E-05    | 0.008655374 |
| DIO3OS       | -1.539817216 | 7.43E-05    | 0.008113913 |
| UNQ6494      | -1.576356643 | 0.000101357 | 0.009478095 |
| TUSC7        | -1.665780284 | 0.000159296 | 0.012259636 |
| ALDH1L1-AS2  | -1.695083967 | 3.96E-05    | 0.00556104  |
| LINC00844    | -1.713622132 | 0.000556809 | 0.026145087 |
| CNTFR-AS1    | -1.898973991 | 0.000357223 | 0.020145341 |
| WNT5A-AS1    | -2.015737953 | 1.19E-05    | 0.002785613 |

---

353 **Supplementary Table 5: Primes and probes for RT-qPCR and antisense oligonucleotides**  
 354 **for mus- and homo- SNHG3.**

| <b>Primers for qPCR</b>        | <b>Primer sequence (5' to 3')</b> |
|--------------------------------|-----------------------------------|
| <b>Homo-SNHG3 forward</b>      | TTCAAGCGATTCTCGTGCC               |
| <b>Homo-SNHG3 reverse</b>      | AAGATTGTCAAACCCTCCCTGT            |
| <b>Homo-SFTA1P forward</b>     | CAGCATTCCAGGTGGGCTTT              |
| <b>Homo-SFTA1P reverse</b>     | CCTTGTTTGGCTTACTCGTGC             |
| <b>Homo-AC004988.1 forward</b> | TAATGGCATGCAGAGCGGAG              |
| <b>Homo-AC004988.1 reverse</b> | TTTTCACGGATTCCACCCCA              |
| <b>Homo-LINC01060 forward</b>  | TCCCGCTCTAATGATCACGC              |
| <b>Homo-LINC01060 reverse</b>  | TGTTACTCTCTGAGTCCTGTGA            |
| <b>Homo-AP001189.4 forward</b> | AGGAACCCTGCCACATCATG              |
| <b>Homo-AP001189.4 reverse</b> | TCACAAACCTATGGGGCCAC              |
| <b>Homo-LINC00702 forward</b>  | ATTCACATCCGGGGCCAATT              |
| <b>Homo-LINC00702 reverse</b>  | AGGAACTGCTCAATGCTGCT              |
| <b>Homo-LINC01592 forward</b>  | GTGCATGAGACTGAGACAGGT             |
| <b>Homo-LINC01592 reverse</b>  | AGGCAGTTGAAATTTGAGCAA             |
| <b>Homo-LINC01450 forward</b>  | GGAAGACCCGCTGATGAGTC              |
| <b>Homo-LINC01450 reverse</b>  | AAAAGACTCACCTGTGCCC               |
| <b>Homo-UNC5B-AS1 forward</b>  | CAAGCCTGCCTTCTTGAGGA              |



---

|                               |                         |
|-------------------------------|-------------------------|
| <b>Homo-UNC5B-AS1 reverse</b> | GGCAGGATCTTTTTGGGGGA    |
| <b>Homo-BMP2 forward</b>      | ACCCGCTGTCTTCTAGCGT     |
| <b>Homo-BMP2 reverse</b>      | TTTCAGGCCGAACATGCTGAG   |
| <b>Homo-ALPL forward</b>      | TTGTGCCAGAGAAAGAGAGAGA  |
| <b>Homo-ALPL reverse</b>      | GTTTCAGGGCATTTTTCAAGGT  |
| <b>Homo-SPP1 forward</b>      | CTCCATTGACTCGAACGACTC   |
| <b>Homo-SPP1 reverse</b>      | CAGGTCTGCGAAACTTCTTAGAT |
| <b>Homo-BGLAP forward</b>     | CACTCCTCGCCCTATTGGC     |
| <b>Homo-BGLAP reverse</b>     | CCCTCCTGCTTGGACACAAAG   |
| <b>Homo-GAPDH forward</b>     | TGATGACATCAAGAAGGTGG    |
| <b>Homo-GAPDH reverse</b>     | TTGTCATACCAGGAAATGAGC   |
| <b>Homo-U6 forward</b>        | CGCTTCGGCAGCACATATAC    |
| <b>Homo-U6 reverse</b>        | TTCACGAATTTGCGTGTCATC   |
| <b>Homo-H19 forward</b>       | TGCTGCACTTTACAACCACTG   |
| <b>Homo-H19 reverse</b>       | ATGGTGTCTTTGATGTTGGGC   |
| <b>Mus-SNHG3 forward</b>      | TCCGGGCGTTACTTAAGGTATA  |
| <b>Mus-SNHG3 reverse</b>      | GCCGAGGCTGTAACAGACAA    |
| <b>Mus-ALPL forward</b>       | GTGACTACCACTCGGGTGAAC   |
| <b>Mus-ALPL reverse</b>       | CTCTGGTGGCATCTCGTTATC   |
| <b>Mus-BMP2 forward</b>       | GGGACCCGCTGTCTTCTAGT    |

---

---

|                          |                         |
|--------------------------|-------------------------|
| <b>Mus-BMP2 reverse</b>  | TCAACTCAAATTCGCTGAGGAC  |
| <b>Mus-SPP1 forward</b>  | AGCAAGAAACTCTTCCAAGCAA  |
| <b>Mus-SPP1 reverse</b>  | GTGAGATTCGTCAGATTCATCCG |
| <b>Mus-BGLAP forward</b> | GAACAGACAAGTCCCACACAGC  |
| <b>Mus-BGLAP reverse</b> | TCAGCAGAGTGAGCAGAAAGAT  |
| <b>Mus-RUNX2 forward</b> | GACTGTGGTTACCGTCATGGC   |
| <b>Mus-RUNX2 reverse</b> | ACTTGGTTTTTCATAACAGCGGA |
| <b>Mus-GAPDH forward</b> | CCCTTAAGAGGGATGCTGCC    |
| <b>Mus-GAPDH reverse</b> | ACTGTGCCGTTGAATTTGCC    |

---

|                             |                      |
|-----------------------------|----------------------|
| <b>ASO for SNHG3 mice</b>   | TGAGGTCCCAACAGGTTTCC |
| <b>ASO for SNHG3 human</b>  | CCAGCCCTCATACCTCTTTT |
| <b>ASO for H19 human</b>    | CCACGGAGTCGGCACACTAT |
| <b>ASO for SFTA1P human</b> | GGAATCTGCATTTCTTTCAG |

---

355

356

357

358

359

360 **Supplementary Table 6: Comparison of echocardiographic in ApoE<sup>-/-</sup> mice of different**  
 361 **groups at 24th of high-cholesterol diets.**

| Parameter                   | ND<br>(N=6)    | HCD<br>(N=6)   | HCD+ASO-NC<br>(N=10) | HCD+ASO-<br>SNHG3 (N=10) |
|-----------------------------|----------------|----------------|----------------------|--------------------------|
| Body weight, g              | 29.21 ± 0.58   | 40.42 ± 2.37   | 40.35 ± 1.78         | 36.97 ± 1.50             |
| Heart rate, bmp             | 533.14 ± 12.57 | 539.77 ± 16.54 | 536.34 ± 10.59       | 535.19 ± 19.31           |
| LVEDd, mm                   | 3.27 ± 0.32    | 3.21 ± 0.13    | 3.22 ± 0.08          | 3.13 ± 0.09              |
| FS, %                       | 46.20±1.62     | 45.82 ± 1.36   | 46.53 ± 1.83         | 45.93 ± 1.63             |
| LVEF, %                     | 70.32 ± 3.34   | 69.86 ± 4.35   | 72.26 ± 4.68         | 71.23 ± 3.76             |
| SV, ml                      | 0.05 ± 0.01    | 0.05 ± 0.01    | 0.05 ± 0.02          | 0.05 ± 0.01              |
| CO, ml/min                  | 28.48 ± 2.13   | 28.37 ± 1.03   | 28.13 ± 1.76         | 28.03 ± 1.88             |
| Aortic valve velocity, mm/s | 1094 ± 30.37   | 2196 ± 43.87*  | 2287 ± 27.76         | 1411 ± 23.58**           |
| AVA, mm <sup>2</sup>        | 1.45 ± 0.05    | 0.87 ± 0.06*   | 0.89 ± 0.01          | 1.12 ± 0.01**            |

362 Note: Data are presented mean ± standard error of the mean.

363 Abbreviations: ApoE<sup>-/-</sup>, apolipoprotein E-deficient; ND, normal diet; HCD, high-cholesterol  
 364 diet; ASO, antisense oligonucleotide; NC, negative control; SNHG3, Small Nucleolar RNA  
 365 Host Gene 3; LVEDd, left ventricular end-diastolic diameter; FS, functional shortening; LVEF,  
 366 left ventricular ejection fraction, SV, stroke volume; CO: cardiac output; AVA, aortic valve  
 367 area.\* p<0.05 vs. ND group.\*\*p<0.05 vs. HCD+ASO-NC group. Unpaired two-tailed Student's  
 368 t-test.

369

370 **Supplementary Table 7: Metabolic parameters in different groups of ApoE<sup>-/-</sup> mice at 24th**  
 371 **of high-cholesterol diets.**

| <b>Parameters</b> | <b>ND<br/>(n=6)</b> | <b>HCD<br/>(n=6)</b> | <b>HCD+ASO-NC<br/>(n=10)</b> | <b>HCD+ASO-<br/>SNHG3 (n=10)</b> |
|-------------------|---------------------|----------------------|------------------------------|----------------------------------|
| Glucose, mmol/L   | 10.66 ± 1.95        | 10.16 ± 1.82         | 10.58 ± 2.16                 | 10.28 ± 2.23                     |
| TC, mmol/L        | 13.38 ± 1.65        | 28.15 ± 2.78         | 28.63 ± 3.12                 | 29.12 ± 3.22                     |
| LDL, mmol/L       | 8.15 ± 1.36         | 25.82 ± 3.45         | 26.55 ± 3.32                 | 26.39 ± 3.55                     |
| TG, mmol/L        | 1.23 ± 0.25         | 2.18 ± 0.32          | 2.08 ± 0.57                  | 2.16 ± 0.48                      |

372 Note: Data are presented mean ± standard error of the mean.

373 Abbreviations: ApoE<sup>-/-</sup>, apolipoprotein E-deficient; ND, normal diet; HCD, high-cholesterol  
 374 diet; ASO, antisense oligonucleotide; NC, negative control; SNHG3, Small Nucleolar RNA  
 375 Host Gene 3.

376

377

378

379

380

381

382 **Supplementary Figures**

383 **Supplementary Figure 1**

384 **Human calcific aortic valves were confirmed by both Alizarin red and Von Kossa staining.**

385 **Scale bar: 100  $\mu$ m.**

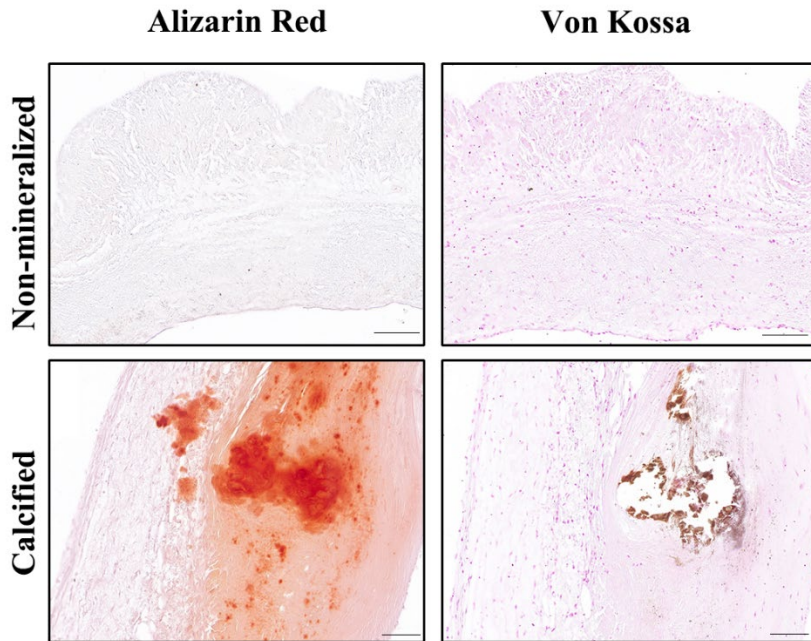

386

387

388

389

390

391 **Supplementary Figure 2**

392 **Immunofluorescence staining showed that hVICs were positive for both alpha smooth**  
393 **muscle actin ( $\alpha$ -SMA; green) and vimentin (red). DAPI was used for nuclear counterstaining**  
394 (blue). Scale bar: 25  $\mu$ m.

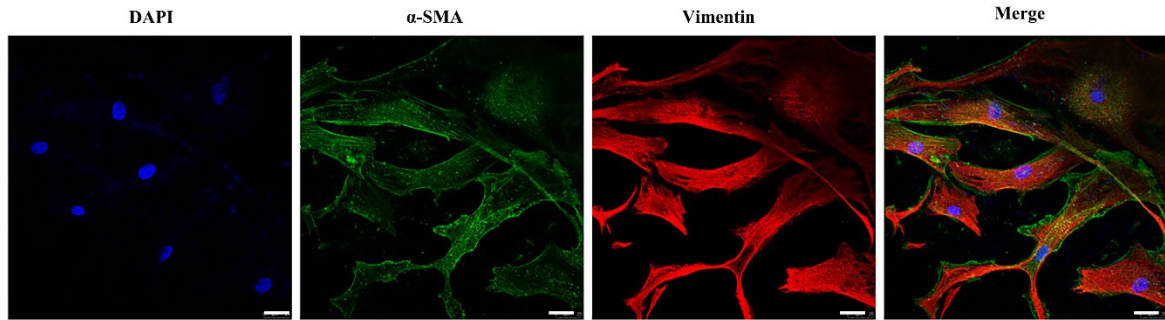

395

396

397

398

399

400

401

402

403

404

405

406

407

408 **Supplementary Figure 3**

409 **Candidate gene selection post differential expression analysis.** (A-J) RT-qPCR validation  
 410 of top 10 upregulated lncRNAs in calcific (N=30) and non-mineralized (N=20) aortic valve  
 411 tissues. Unpaired two-tailed Student's t-test. Three osteogenic differentiation markers (alkaline  
 412 phosphatase [ALP], RUNX2, and osteopontin [OPN] ) mRNA levels in hVICs transfected with  
 413 antisense oligonucleotide (ASO) targeting (K) H19, (L) SFTA1P, (M) SNHG3 (N=6/group).  
 414 Unpaired two-tailed Student's t-test. Corrected for multiple comparisons using the Holm-Sidak  
 415 method (3 tests) for K, L and M.\*\*\*  $p < 0.001$ . Values are the mean  $\pm$  SEM.

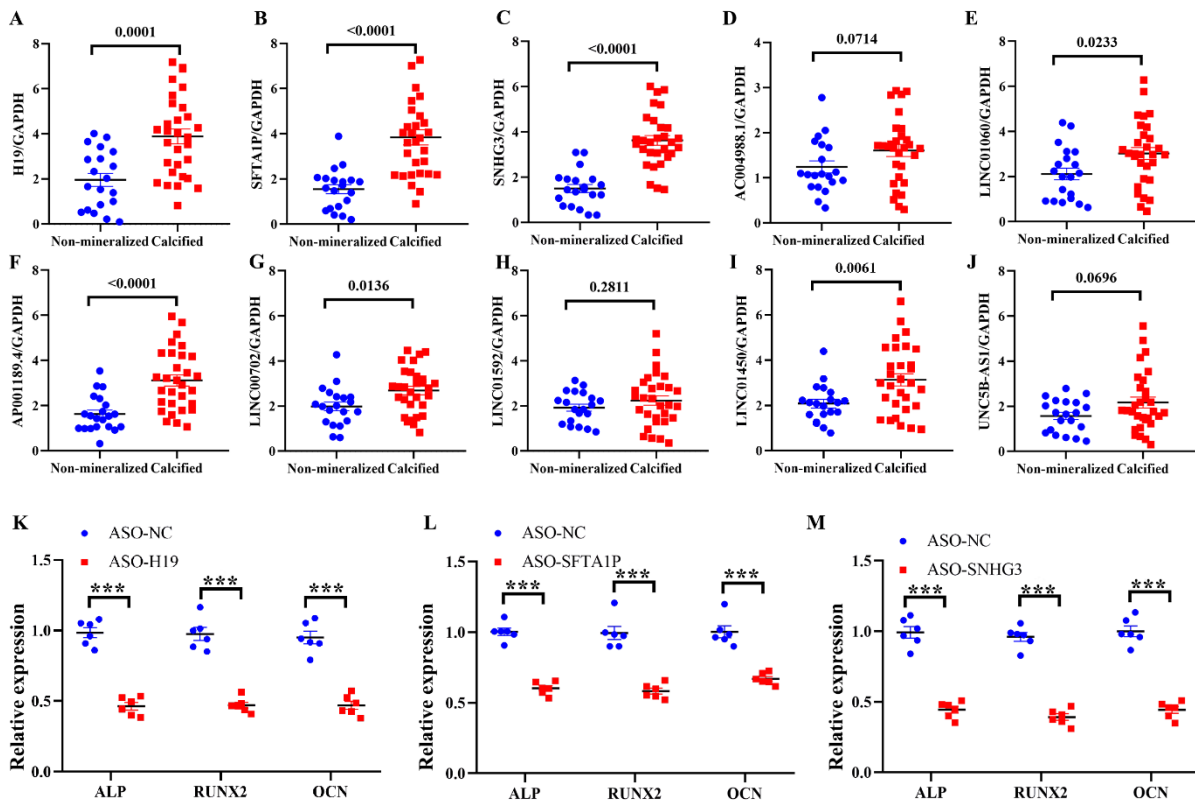

416

417

418

419 **Supplementary Figure 4**

420 **Representative echocardiographic images of transvalvular peak jet velocity in ApoE<sup>-/-</sup>**

421 **mice from 12th week to 24 week of high-cholesterol diet (HCD) and Normal diet (ND).**

422 The transvalvular peak jet velocity is significant higher in HCD group than that in ND group

423 and the aortic valve area (AVA) is more smaller in HCD group than that in ND group, which

424 show the mice have severe aortic valve calcification arising from HCD diet. N=6/group. Values

425 are mean  $\pm$  SEM. \*\*\* P<0.001 between ND and HCD group at indicated timepoint with two-

426 way ANOVA corrected for multiple comparisons using the least significant difference (LSD)

427 test.

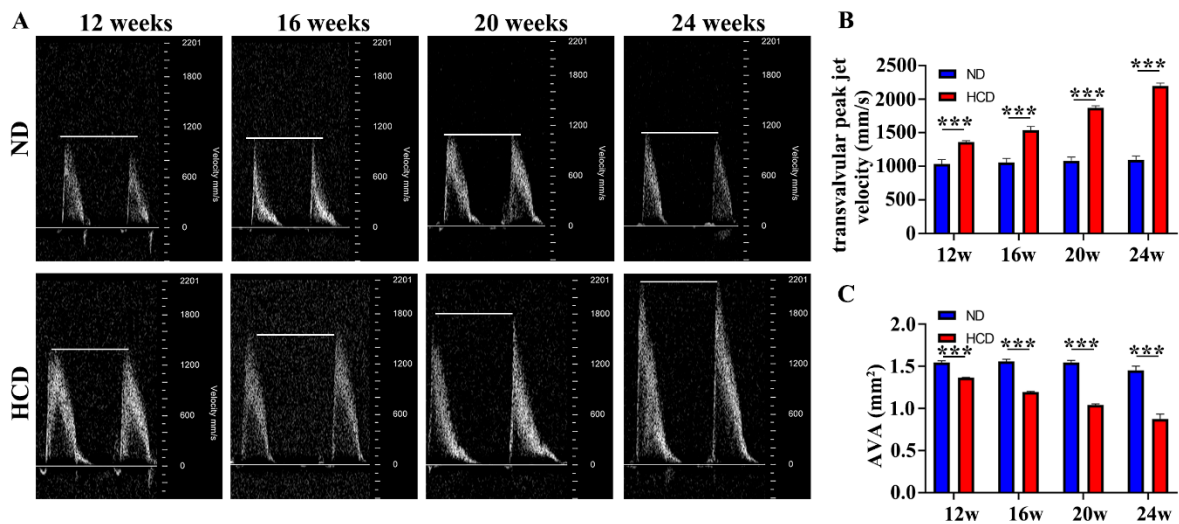

428

429

430

431

432

433



434 **Supplementary Figure 5**

435 **Gene set enrichment analysis (GSEA) of osteoblast differentiation.** GSEA revealed the  
436 calcium signaling pathway (A), MAPK signaling pathway(B), gene set of aortic valve stenosis  
437 (C) and increased bone mineral density (D) significantly upregulated in condition of SNHG3-  
438 overexpressed hVICs with adenovirus (ADV) compared with Ad-GFP.

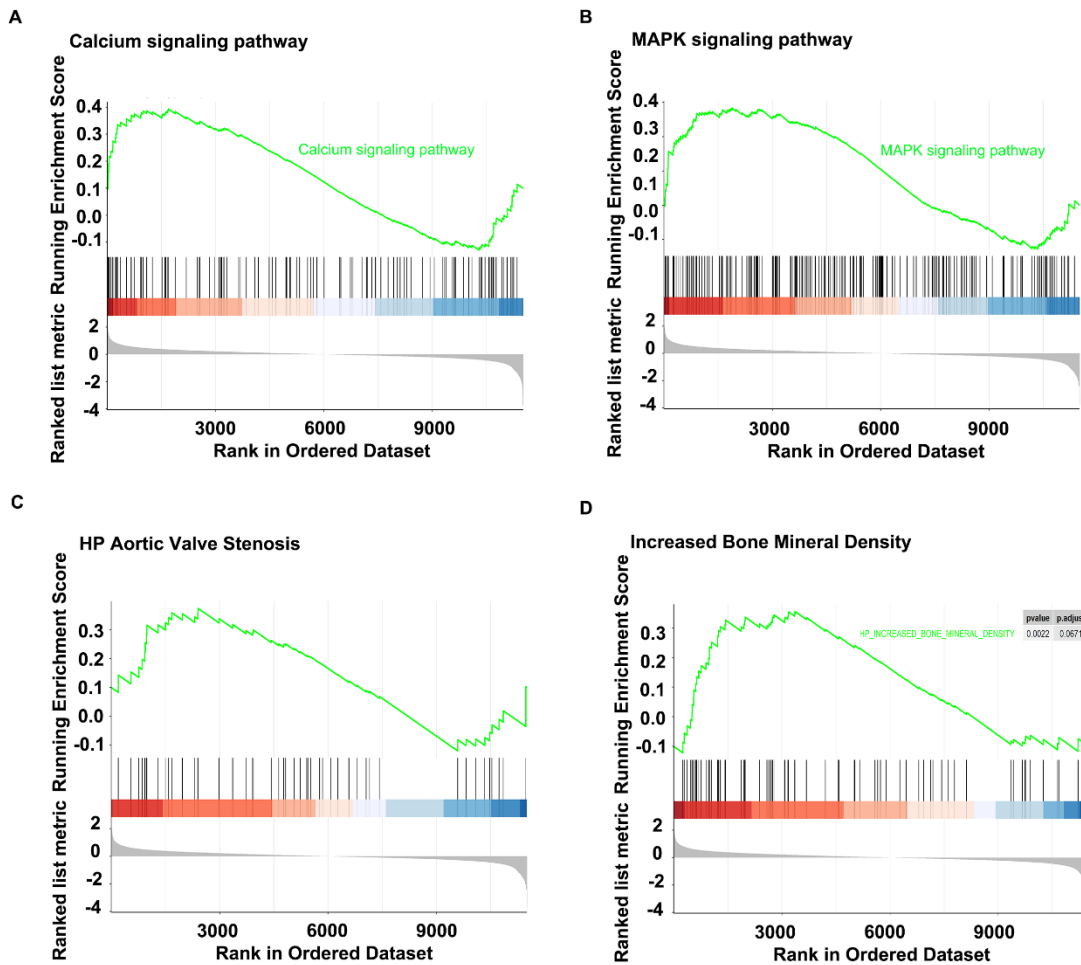

439

440

441 **Supplementary Figure 6**

442 **Kyoto Encyclopedia of Genes and Genomes (KEGG) enrichment analysis of osteoblast**

443 **differentiation.** A) KEGG enrichment analysis of TGF- $\beta$  signaling pathway was significantly

444 downregulated in case of SNHG3 knockdown with antisense oligonucleotide (ASO). B) KEGG

445 of TGF- $\beta$  signaling pathway was significantly upregulated in condition of SNHG3

446 overexpression with adenovirus (ADV).

447

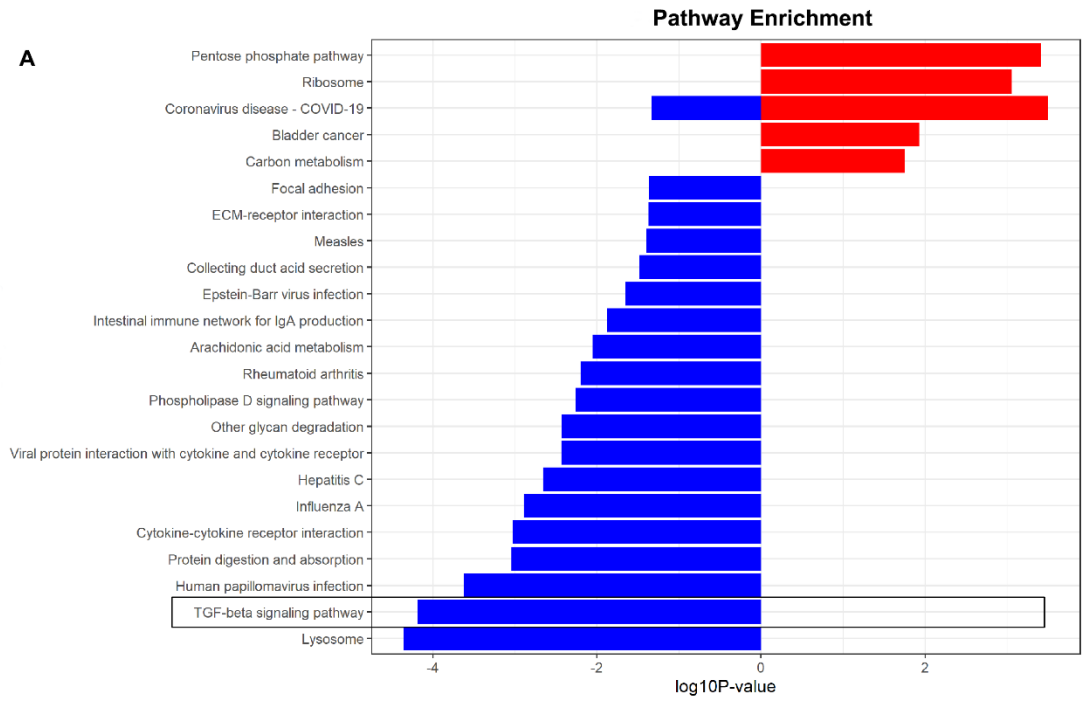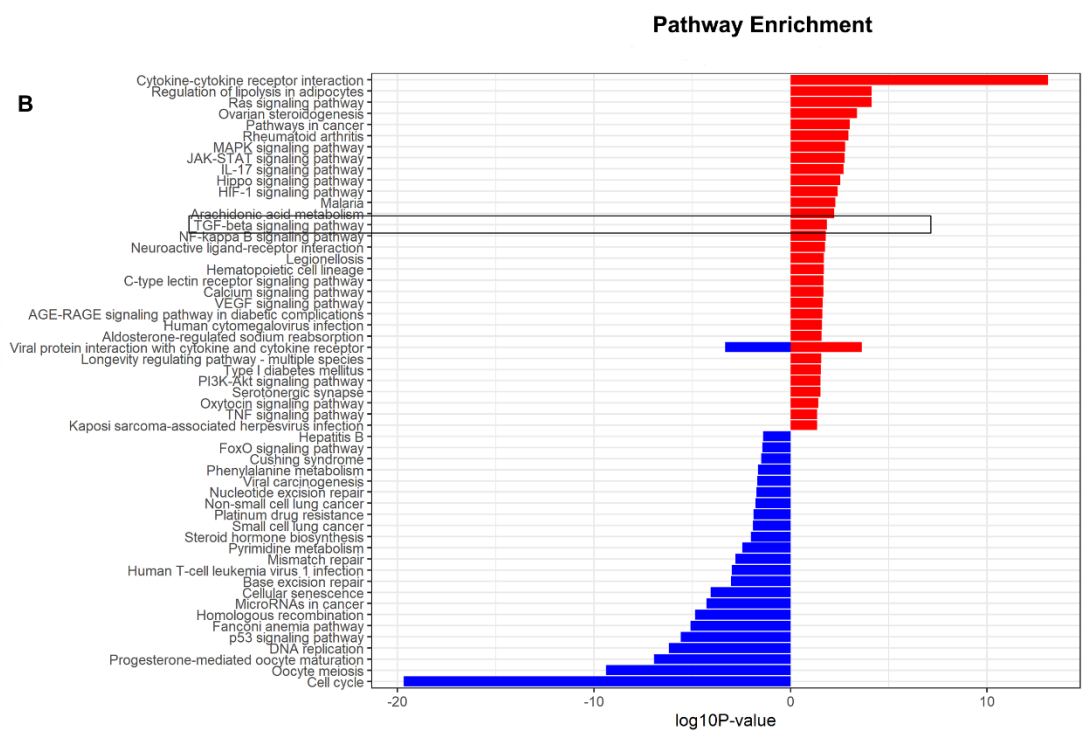

449 **Supplementary Figure 7**

450 **Endogenous SNHG3 (red) in hVICs detected by RNA-FISH. Probes for 18S (red) and U6**

451 (red) serve as cytoplasmic and nuclear controls, respectively. Scale bar, 25  $\mu$ m.

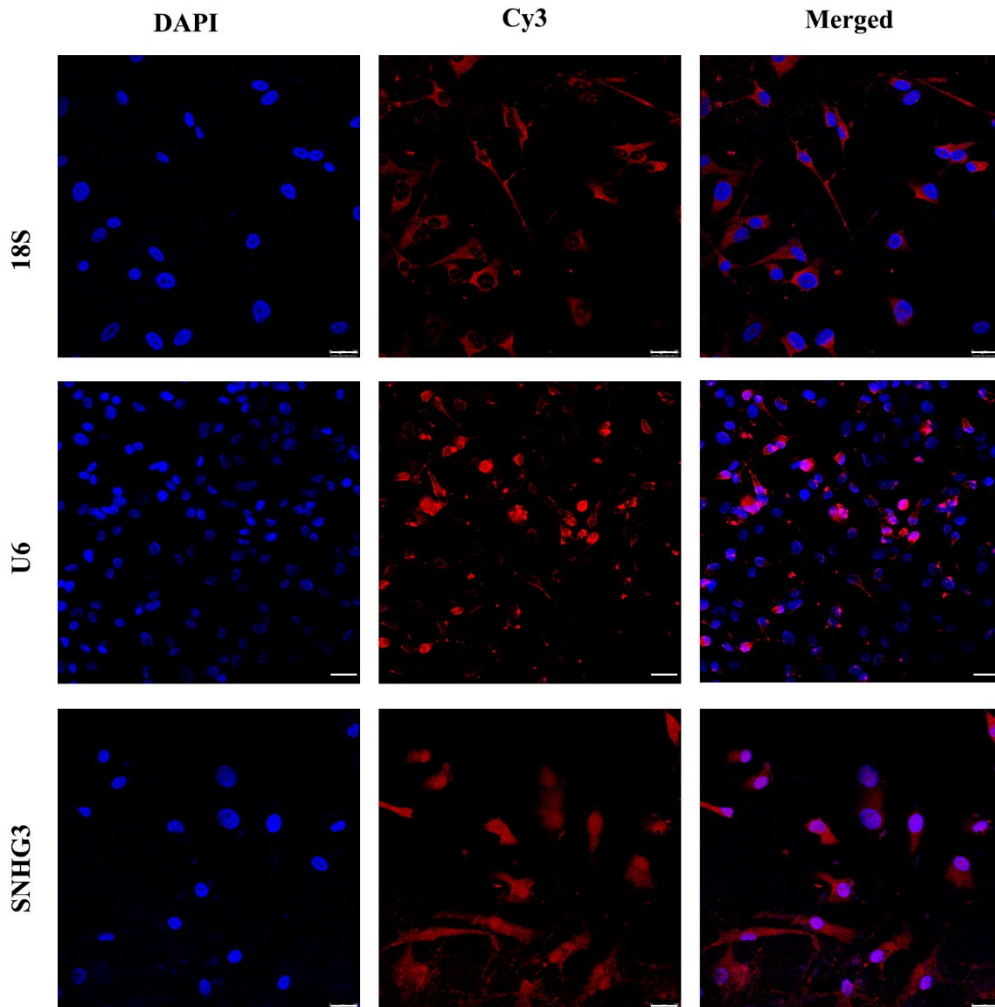

452

453

454

455

456 **Supplementary Figure 8**

457 **Promoting calcification culture of hVICs does not change subcellular abundance of**

458 **SNHG3 in vitro.** Cytoplasmatic, nuclear RNA abundance of SNHG3 compared to nuclear

459 marker U6 and cytoplasmic marker GAPDH in subcellular fractions of hVICs after osteogenic

460 stimulation with osteogenic induction medium for 72 hours (n=3). Data are means  $\pm$  SD.

461

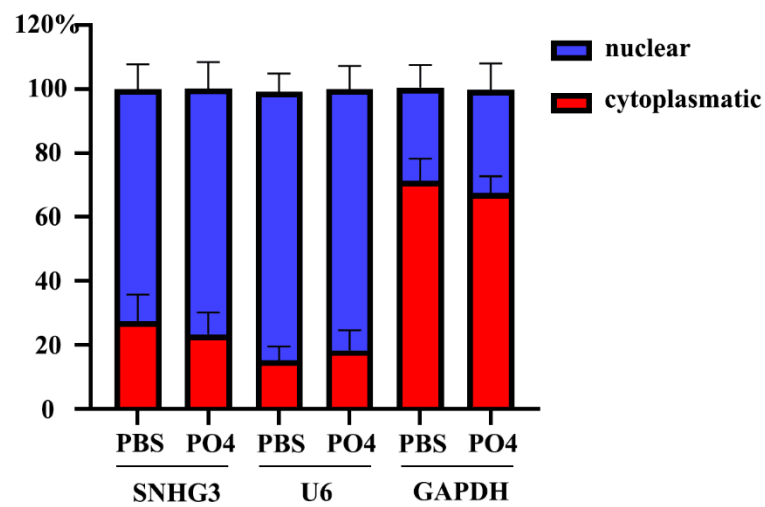

462

463

464

465

466

467

468

469 **Supplementary Figure 9**

470 **EZH2 interacts directly with SNHG3 based on Sequence and Structure.** A) Sequence-  
471 based prediction of SNHG3-EZH2 interaction, with random forest, RF classifier score 0.85 and  
472 support vector machine, SVM classifier score of 0.96. \*Interaction probabilities generated by  
473 RPISeq range from 0 to 1. In performance evaluation experiments, predictions with  
474 probabilities >0.5 were considered positive, i.e., indicating that the corresponding RNA and  
475 protein are likely to interact. B) CatRAPID fragment tool reveals that EZH2 region (amino-acid  
476 residues 326-377) and SNHG3 region (1932-2025) have the highest interaction propensity,  
477 discriminative power, Normalized Score. C) Predicted RNA structure of the motif identified in  
478 SNHG3 region (1932-2025) responsible for its interaction with EZH2. D) EZH2 region (amino-  
479 acid residues 326-377) interacted with SNHG3 included a Thr-345, a conservative CDK  
480 phosphorylation site, which can be phosphorylated by AKT1 and promote maintenance of  
481 H3K27m3 levels at EZH2-target loci, thus leading to epigenetic gene silencing.

**A**

**RNA-Protein Interaction Prediction  
(RPISeq)**

**Inpt Sequences**

**Protein: (EZH2):** NCBI Ref. Seq.

**NP\_001190176**

**RNA: (SNHG3):** NCBI Ref. Seq.

**NR\_036473.1**

| Interaction Probability<br>(EZH2:SNHG3) |              |
|-----------------------------------------|--------------|
| RF classifier Prediction                | <b>*0.85</b> |
| SVM classifier Prediction               | <b>*0.96</b> |

**B**

|    | EZH2 region | SNHG3 region | Interaction Propensity | Discriminative Power | Normalized Score |
|----|-------------|--------------|------------------------|----------------------|------------------|
| 1  | 326-377     | 1932-2025    | 26.05                  | 67                   | 4.21             |
| 2  | 326-377     | 1933-2026    | 24.15                  | 63                   | 3.90             |
| 3  | 226-277     | 1932-2025    | 21.60                  | 56                   | 3.49             |
| 4  | 496-547     | 1932-2025    | 21.33                  | 56                   | 3.45             |
| 5  | 321-372     | 1932-2025    | 20.12                  | 54                   | 3.25             |
| 6  | 46-97       | 1932-2025    | 19.84                  | 52                   | 3.21             |
| 7  | 496-547     | 1933-2026    | 19.53                  | 52                   | 3.16             |
| 8  | 196-247     | 1932-2025    | 19.18                  | 52                   | 3.10             |
| 9  | 226-277     | 1933-2026    | 18.73                  | 50                   | 3.03             |
| 10 | 126-177     | 1932-2025    | 18.61                  | 50                   | 3.01             |

**C**

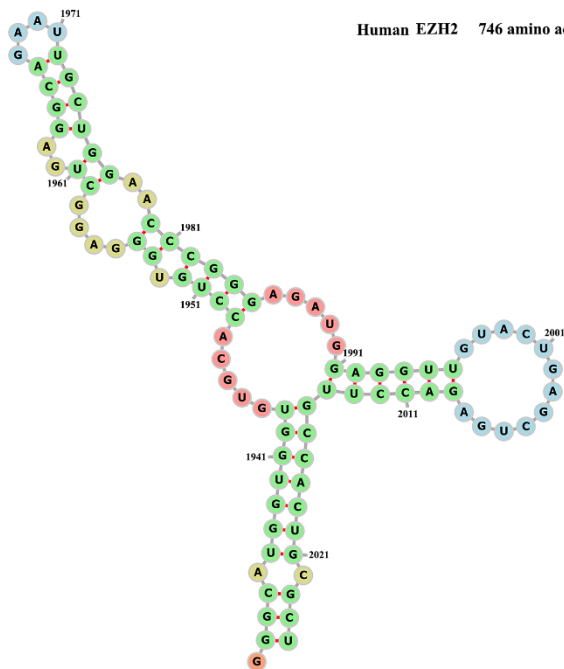

**D**

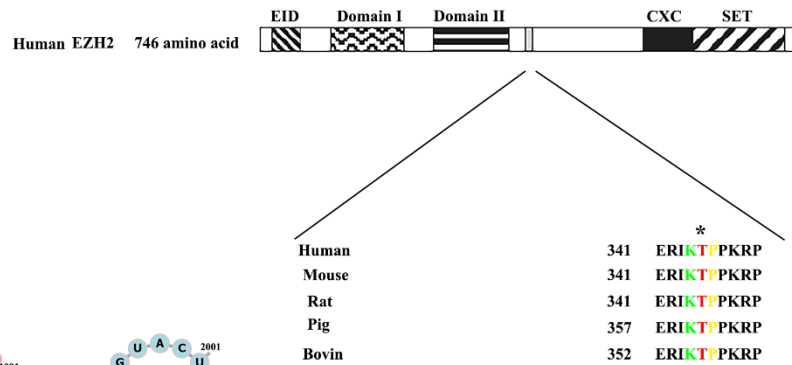

482

483

484

485

486

487

488 **Reference**

- 489 1. Mahmut A, Boulanger MC, Bouchareb R, Hadji F, Mathieu P. Adenosine derived from  
490 ecto-nucleotidases in calcific aortic valve disease promotes mineralization through A2a  
491 adenosine receptor. *Cardiovasc Res* 2015;106:109-20.
- 492 2. Hadji F, Boulanger MC, Guay SP et al. Altered DNA Methylation of Long Noncoding  
493 RNA H19 in Calcific Aortic Valve Disease Promotes Mineralization by Silencing  
494 NOTCH1. *Circulation* 2016;134:1848-1862.
- 495 3. Kim D, Pertea G, Trapnell C, Pimentel H, Kelley R, Salzberg SL. TopHat2: accurate  
496 alignment of transcriptomes in the presence of insertions, deletions and gene fusions.  
497 *Genome Biol* 2013;14:R36.
- 498 4. Pertea M, Kim D, Pertea GM, Leek JT, Salzberg SL. Transcript-level expression  
499 analysis of RNA-seq experiments with HISAT, StringTie and Ballgown. *Nat Protoc*  
500 2016;11:1650-67.
- 501 5. Sun L, Luo H, Bu D et al. Utilizing sequence intrinsic composition to classify protein-  
502 coding and long non-coding transcripts. *Nucleic Acids Res* 2013;41:e166.
- 503 6. Kong L, Zhang Y, Ye ZQ et al. CPC: assess the protein-coding potential of transcripts  
504 using sequence features and support vector machine. *Nucleic Acids Res* 2007;35:W345-  
505 9.
- 506 7. Finn RD, Bateman A, Clements J et al. Pfam: the protein families database. *Nucleic*  
507 *Acids Res* 2014;42:D222-30.



- 508 8. Lin MF, Jungreis I, Kellis M. PhyloCSF: a comparative genomics method to distinguish  
509 protein coding and non-coding regions. *Bioinformatics* 2011;27:i275-82.
- 510 9. Ritchie ME, Phipson B, Wu D et al. limma powers differential expression analyses for  
511 RNA-sequencing and microarray studies. *Nucleic Acids Res* 2015;43:e47.
- 512 10. Subramanian A, Tamayo P, Mootha VK et al. Gene set enrichment analysis: a  
513 knowledge-based approach for interpreting genome-wide expression profiles. *Proc Natl*  
514 *Acad Sci U S A* 2005;102:15545-50.
- 515 11. Liberzon A, Birger C, Thorvaldsdottir H, Ghandi M, Mesirov JP, Tamayo P. The  
516 Molecular Signatures Database (MSigDB) hallmark gene set collection. *Cell Syst*  
517 2015;1:417-425.
- 518 12. Li LC, Dahiya R. MethPrimer: designing primers for methylation PCRs. *Bioinformatics*  
519 2002;18:1427-31.
- 520 13. Liu H, Xu Y, Yao B, Sui T, Lai L, Li Z. A novel N6-methyladenosine (m6A)-dependent  
521 fate decision for the lncRNA THOR. *Cell Death Dis* 2020;11:613.
- 522 14. Agostini F, Zanzoni A, Klus P, Marchese D, Cirillo D, Tartaglia GG. catRAPID omics:  
523 a web server for large-scale prediction of protein-RNA interactions. *Bioinformatics*  
524 2013;29:2928-30.
- 525 15. Muppirala UK, Honavar VG, Dobbs D. Predicting RNA-protein interactions using only  
526 sequence information. *BMC bioinformatics* 2011;12:489.
- 527 16. Will S, Jabbari H. Sparse RNA folding revisited: space-efficient minimum free energy

- 528 structure prediction. *Algorithms Mol Biol* 2016;11:7.
- 529 17. Wang Y, Han D, Zhou T et al. Melatonin ameliorates aortic valve calcification via the  
530 regulation of circular RNA CircRIC3/miR-204-5p/DPP4 signaling in valvular  
531 interstitial cells. *J Pineal Res* 2020;69.
- 532 18. Yu C, Li L, Xie F et al. LncRNA TUG1 sponges miR-204-5p to promote osteoblast  
533 differentiation through upregulating Runx2 in aortic valve calcification. *Cardiovasc Res*  
534 2018;114:168-179.
- 535 19. Isoda K, Matsuki T, Kondo H, Iwakura Y, Ohsuzu F. Deficiency of interleukin-1  
536 receptor antagonist induces aortic valve disease in BALB/c mice. *Arterioscler Thromb*  
537 *Vasc Biol* 2010;30:708-15.
